# Supplementary material for: Increasing Angiogenesis Factors in Hypoxic Diabetic Wound Conditions by siRNA Delivery: Additive Effect of LbL-Gold Nanocarriers and Desloratadine-Induced Lysosomal Escape
Source: MDPI journal article supplement (doi:10.3390/ijms22179216), 2021-08-26
Supplement: s1 [file s1]

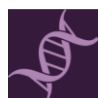

Article

# Increasing angiogenesis factors in hypoxic diabetic wound conditions by siRNA delivery: additive effect of LbL-gold nanocarriers and desloratadine-induced lysosomal escape

Elnaz Shaabani <sup>1,2</sup>, Maryam Sharifiaghdam <sup>1,2</sup>, Joris Lammens <sup>3</sup>, Herlinde De Keersmaecker <sup>1,4</sup>, Chris Vervaeke <sup>3</sup>, Thomas De Beer <sup>5</sup>, Elahe Motevaseli <sup>6</sup>, Mohammad Hossein Ghahremani <sup>7</sup>, Parvin Mansouri <sup>8</sup>, Stefaan De Smedt <sup>1,4</sup>, Koen Raemdonck <sup>1</sup>, Reza Faridi-Majidi <sup>2,\*</sup>, Kevin Braeckmans <sup>1,4,\*</sup> and Juan C. Fraire <sup>1</sup>

- <sup>1</sup> Laboratory of General Biochemistry and Physical Pharmacy, Faculty of Pharmacy, Ghent University, Ottergemsesteenweg 460, 9000 Ghent, Belgium; elnaz.shaabanisichani@ugent.be (E.S.); maryam.sharifiaghdam@ugent.be (M.S.); herlinde.dekeersmaecker@ugent.be (H.D.K.); Stefaan.Desmedt@ugent.be (S.D.S.); koen.raemdonck@UGent.be (K.R.); juan.fraire@ugent.be (J.C.F.)
- <sup>2</sup> Department of Medical Nanotechnology, School of Advanced Technologies in Medicine, Tehran University of Medical Sciences, Tehran, Iran
- <sup>3</sup> Laboratory of Pharmaceutical Technology, Department of Pharmaceutics, Ghent University, Ottergemsesteenweg 460, 9000 Ghent, Belgium; joris.lammens@ugent.be (J.L.); Chris.Vervaeke@ugent.be (C.V.)
- <sup>4</sup> Center for Advanced Light Microscopy, Ghent University, 9000 Ghent, Belgium
- <sup>5</sup> Laboratory of Pharmaceutical Process Analytical Technology (LPPAT), Department of Pharmaceutical Analysis, Ghent University, Ottergemsesteenweg 460, 9000 Ghent, Belgium; Thomas.DeBeer@Ugent.be
- <sup>6</sup> Department of Molecular Medicine, School of Advanced Technologies in Medicine, Tehran University of Medical Sciences, Tehran, Iran; e\_motevaseli@tums.ac.ir
- <sup>7</sup> Department of Toxicology and Pharmacology, Faculty of Pharmacy, Tehran University of Medical Sciences, Tehran, Iran; mhghahremani@tums.ac.ir
- <sup>8</sup> Skin and Stem Cell Research Center, Tehran University of Medical Sciences, Tehran, Iran; mansorip@sina.tums.ac.ir
- \* Correspondence: refaridi@sina.tums.ac.ir (R.F.-M.); Kevin.Braeckmans@UGent.be (K.B.)

**Table S1.** Correlation between the effective siRNA concentration and the corresponding AuNPs concentration.

| siRNA Concentration | AuNPs/mL <sup>1</sup> |
|---------------------|-----------------------|
| 5 nM                | $2.62 \times 10^{10}$ |
| 10 nM               | $5.25 \times 10^{10}$ |
| 15 nM               | $7.87 \times 10^{10}$ |
| 20 nM               | $1.05 \times 10^{11}$ |
| 30 nM               | $1.57 \times 10^{11}$ |
| 40 nM               | $2.10 \times 10^{11}$ |

<sup>1</sup> The concentration of AuNPs in the dispersions was estimated from their extinction spectra as previously reported (64).

Table S2. siRNA Sequences.

|             | Sense                           | Anti-sense                         |
|-------------|---------------------------------|------------------------------------|
| Egln 1.13.1 | 5'-CUAUUGUUCAUGUAAAACAUGAAAA-3' | 5'-UUUUCAUGUUUUACAUGAACAAUAGCA-3'  |
| Egln 1.13.2 | 5'-GCGUGACAUGUAUAUAUAUCUAAA-3'  | 5'-UUUAGAUAAUAUAUAACAUGUCACGCAU-3' |
| Egln 1.13.3 | 5'-CGCCAAGGUAAGUGGAGGUUUUCTT-3' | 5'-AAGAAUACCUCACUUACCUUGGCGUC-3'   |

Table S3. Primer Sequences used in Real-time PCR.

|                | Forward Primer                  | Reverse Primer                 | Size (bp) |
|----------------|---------------------------------|--------------------------------|-----------|
| PHD-2          | 5'-GCGTAACCCCTCATGAAGTACA-3'    | 5'-CAACCCTCACACCTTTCTCAC-3'    | 128       |
| HIF-1 $\alpha$ | 5'-GCTCACCATCAGTTATTTACGTG-3'   | 5'-CCGTCATCTGTTAGCACCAT-3'     | 138       |
| VEGF           | 5'-CCGAAACCATGAACCTTTCTGC-3'    | 5'-GACTTCTGCTCTCCTTCTGTC-3'    | 115       |
| FGF-2          | 5'-GTCAAACACTACAACCTCCAAGCAG-3' | 5'-GAAACACTCTTCTGTAACACACTT-3' | 129       |
| $\beta$ -Actin | 5'-GATTACTGCTCTGGCTCCTAG-3'     | 5'-GACTCATCGTACTCCTGCTTG-3'    | 147       |

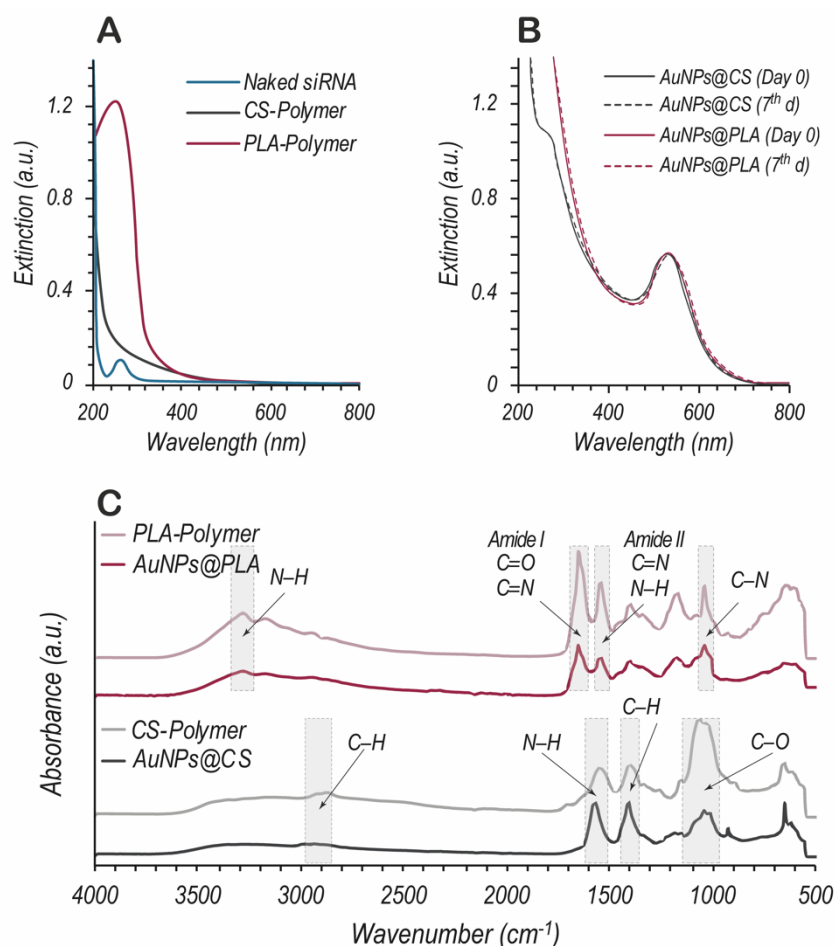

**Figure S1. Characterization of layer-by-layer (LbL) synthesis with CS or PLA as outer layer.** (A) UV-vis spectrum of Chitosan and Poly L-Arginine. (B) UV-vis spectrum of AuNPs@CS and AuNPs@PLA immediately after synthesis (day 0) and 7 days after synthesis. (C) FTIR spectra of Chitosan, AuNPs@CS, Poly L-arginine and AuNPs@PLA confirming successful capping of the NPs by CS or PLA as 3<sup>rd</sup> layer.

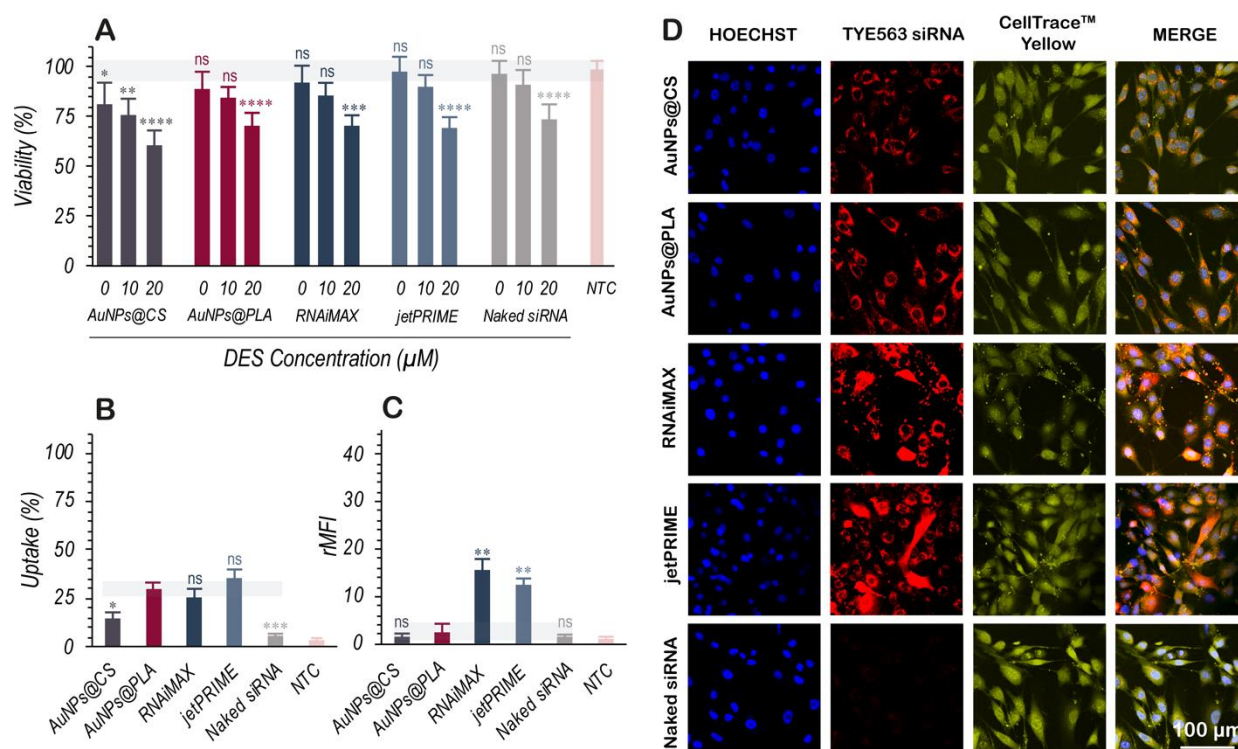

**Figure S2. Cytotoxicity and evaluation of nanoformulation internalization in NIH-3T3 cells.** (A) Cell viability of NIH-3T3 cells after 4 h incubation with the nanoformulations and transfection reagents (10 nM effective concentration of siRNA), washing and 20 h incubation with DES (0, 10, and 20 μM). (B) Uptake percentage (= % positive cells) and (C) relative mean fluorescence intensity per cell of TYE563 siRNA labeled nanocarriers (10 nM) after 4 h treatment on NIH-3T3 cells as determined by flow cytometry. (D) Confocal images of NIH-3T3 cells after 4 h treatment with different nanocarriers at 10 nM effective concentration of siRNA. Nuclei were stained with Hoechst 33342 (blue), the cytoplasm with CellTrace™ Yellow (yellow), while TYE563 siRNA is shown in red. The scale bar corresponds to 100 μm. Data are represented as the mean ± the standard deviation for a minimum of three independent experiments. Statistical significance is indicated when appropriate, in (A) when referring to not treated control (NTC) and in (B) and (C) when compared to AuNPs@PLA. (ns = not significant  $p > 0.05$ , \*  $p \leq 0.05$ , \*\*  $p \leq 0.01$ , \*\*\*  $p \leq 0.001$ , \*\*\*\*  $p \leq 0.0001$ ).

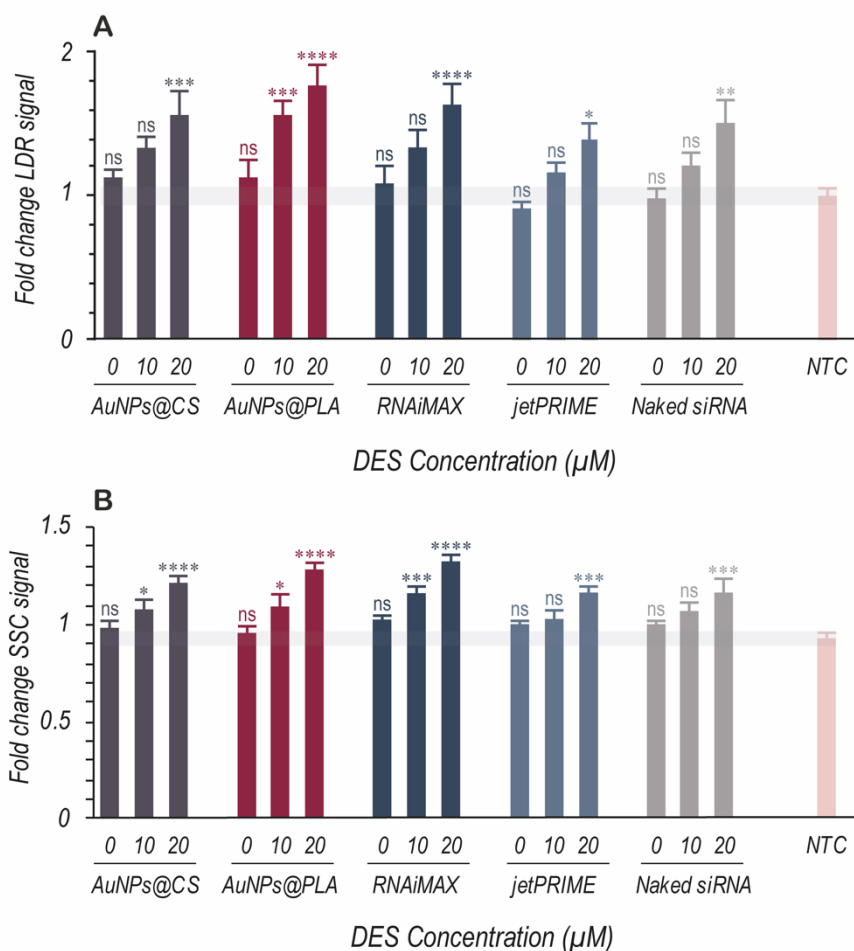

**Figure S3. The effect of DES on lysosomal swelling and cellular granularity.** (A) Fold change in LysoTracker® Deep Red (LDR) signal and (B) Fold change in side scatter (SSC) signal was measured via flow cytometry for NIH-3T3 cells treated 4 h with nanocarriers (10 nM effective concentration of siRNA) followed by 20 h treatment with 3 different concentrations of DES (0, 10, and 20  $\mu\text{M}$ ). Data are represented as the mean  $\pm$  the standard deviation of three independent experiments. Statistical significance, with respect to the not treated control (NTC), is indicated when appropriate (ns = not significant  $p > 0.05$ , \*  $p \leq 0.05$ , \*\*  $p \leq 0.01$ , \*\*\*  $p \leq 0.001$ , \*\*\*\*  $p \leq 0.0001$ ).

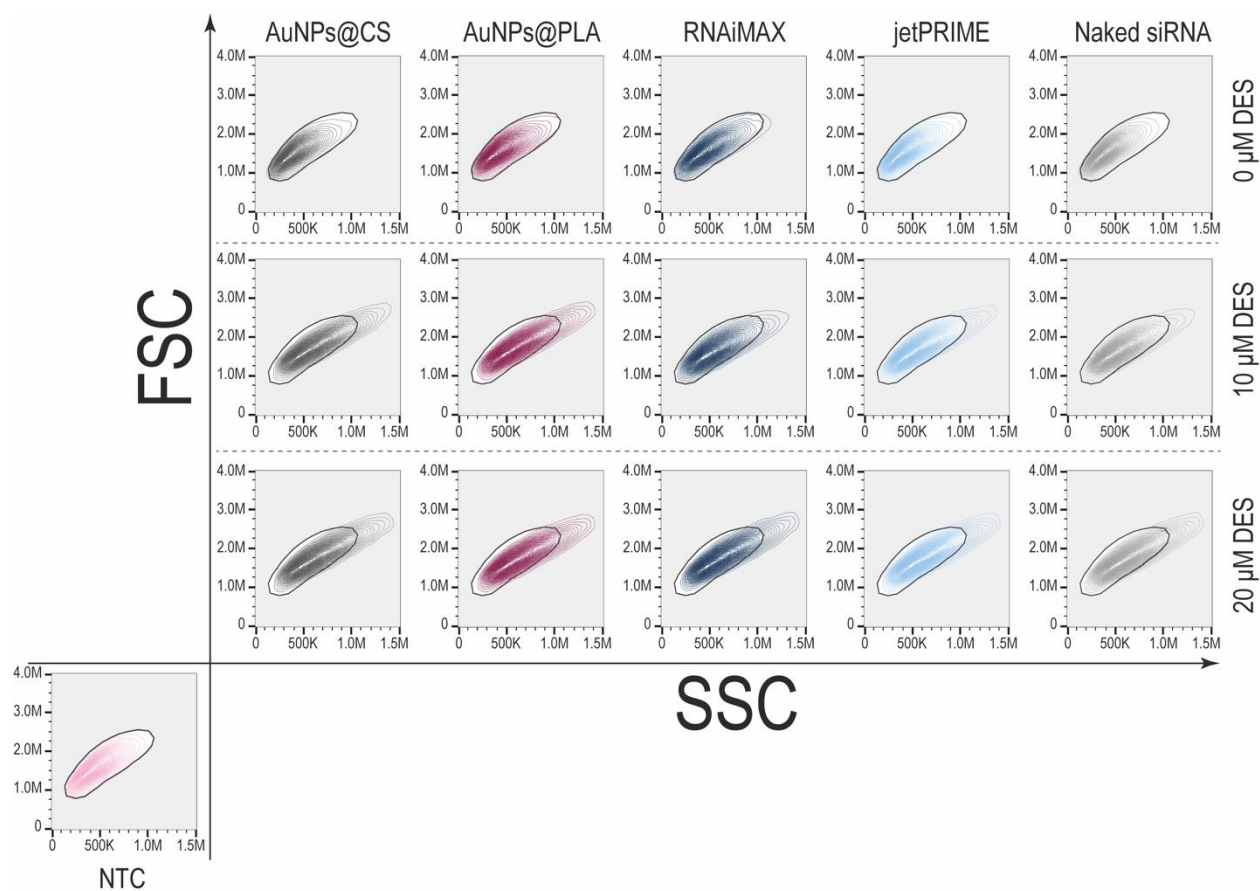

**Figure S4. The effect of DES on cellular granularity.** Representative contour plots for the not treated control (NTC) cells, or cells transfected with nanocarriers (30 nM effective concentration of siRNA) followed by 0, 10 and 20 μM DES treatment.

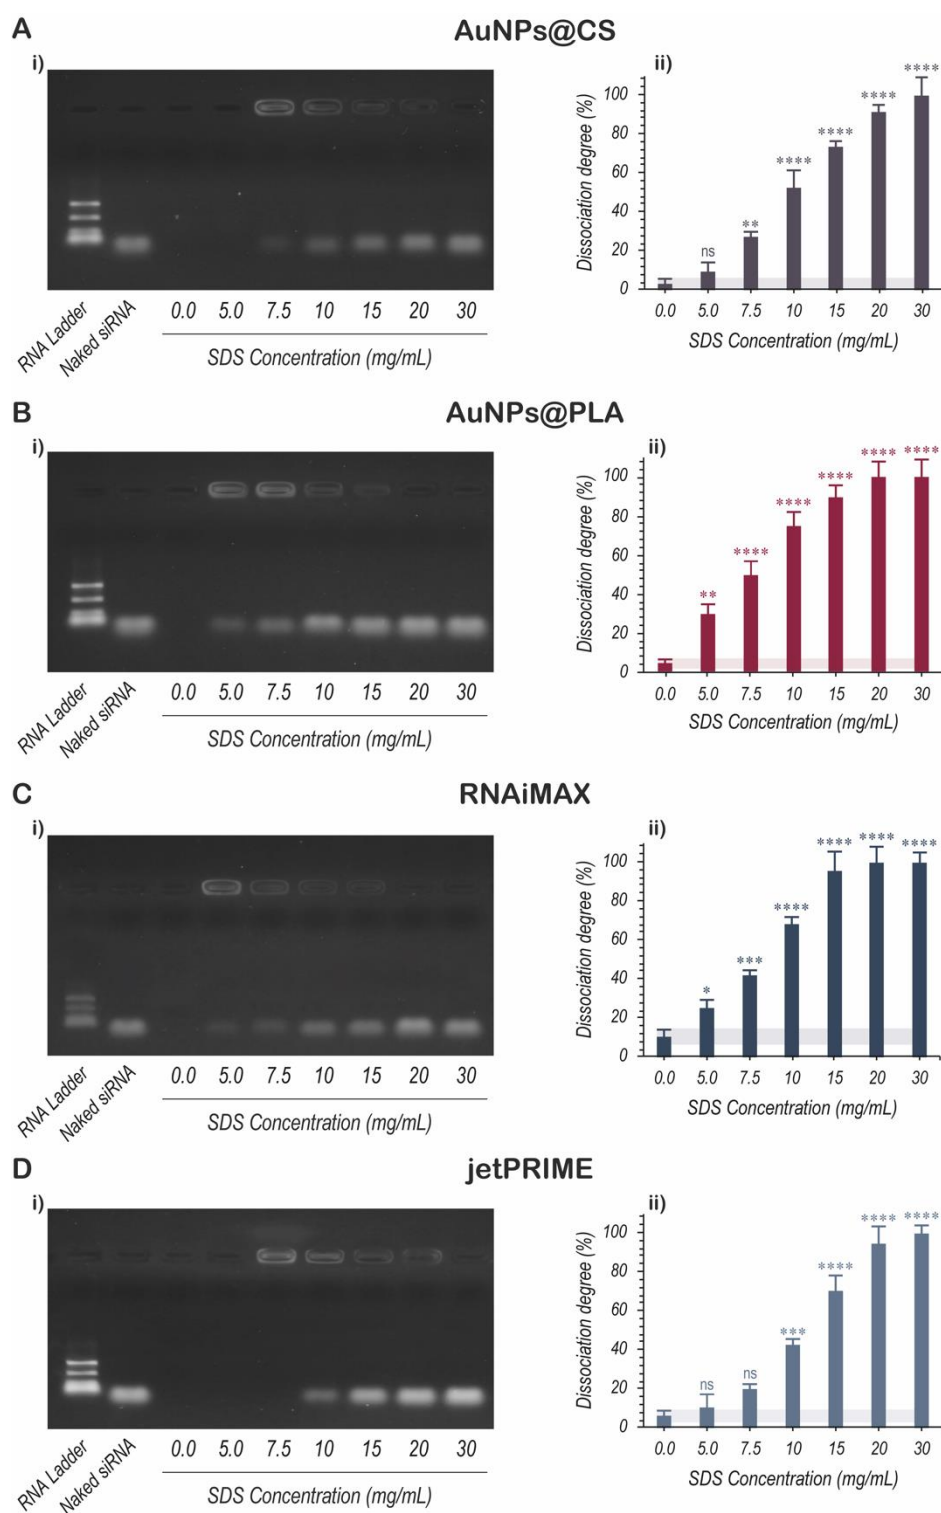

**Figure S5. Forced dissociation of siRNA from nanoformulations in HEPES buffer by addition of SDS.** Representative (i) gel electrophoresis images and (ii) the dissociation degree (%) calculated from FFS for (A) AuNP@CS, (B) AuNP@PLA, (C) Lipofectamine® RNAiMAX and (D) jetPRIME® with increasing concentrations of SDS.
